# Supplementary material for: Anti-obesity effects of DHA and EPA in high fat-induced insulin resistant mice
Source: Royal Society of Chemistry journal article supplement (doi:10.1039/d0fo02448a), 2020-12-17
Supplement: d0fo02448a3.pdf [file d0fo02448a3.pdf]

## Supplementary materials

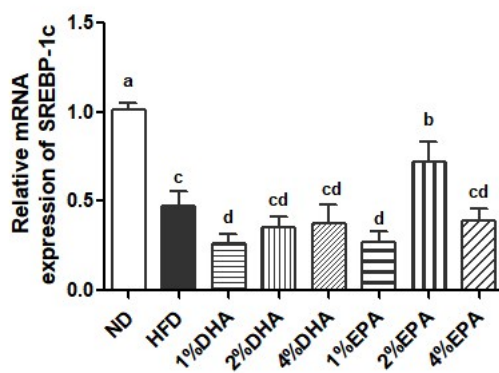

**Figure S.** The mRNA expression of SREBP-1c in eWAT of IR mice. Means  $\pm$  SEM (n=6). Labeled means without a common letter are significantly different ( $P < 0.05$ ).
