# Supplementary figures and images for: Anti-obesity effects of DHA and EPA in high fat-induced insulin resistant mice
Source: Royal Society of Chemistry journal article supplement (doi:10.1039/d0fo02448a), 2020-12-17

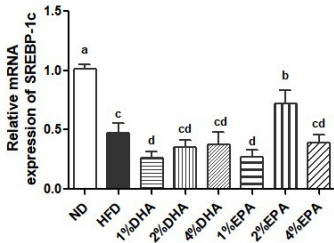

Supplement: d0fo02448a2.pdf [file d0fo02448a2.pdf]
